# Supplementary material for: Deep eutectic solvent boosted ruthenium catalysts for acetylene hydrochlorination
Source: Royal Society of Chemistry journal article supplement (doi:10.1039/d4me00045e), 2024-01-01
Supplement: d4me00045e1.pdf [file d4me00045e1.pdf]

## Supporting Information

### Deep eutectic solvent boosted ruthenium catalysts for acetylene hydrochlorination

Linfeng Li,<sup>a</sup> Bao Wang,<sup>a</sup> Tiantong Zhang,<sup>a</sup> Haiyang Zhang,<sup>b</sup> Wei Li,<sup>a</sup> Jiangjiexing Wu<sup>\*c</sup> and Jinli Zhang<sup>\*ab</sup>

<sup>a</sup> School of Chemical Engineering and Technology, Tianjin University, Tianjin, 300072, P.R. China

<sup>b</sup> School of Chemistry and Chemical Engineering of Shihezi University, Shihezi, Xinjiang 832000, P.R. China.

<sup>c</sup> School of Marine Science and Technology, Tianjin University, Tianjin, 300072, P.R. China

\*Corresponding authors: Dr. Jiangjiexing Wu, E-mail: wujiangjiexing2007@126.com; Prof. Jinli Zhang, E-mail: zhangjinli@tju.edu.cn.

## Table of Contents

### 1. Experiments

1.1 DFT calculations

1.2 Characterisation of the catalysts

1.3 Catalytic performance evolution

### 2. Supplementary Figures

**Fig. S1** Chemical structure and abbreviation of HBAs and HBDs used.

**Fig. S2** Hydrogen bond structure of 2DMI-DMU.

**Fig. S3** FT-IR spectrum of (a) 0.5DMI-DMU, (b) 1DMI-DMU, and (c) 4DMI-DMU.

**Fig. S4** UV-Vis spectra of 2DMI-DMU, DMI and DMU.

**Fig. S5** Selectivity to VCM (a) for Ru-10[2DMI-DMU]/AC, Ru-10[DMU]/AC, Ru-10[DMI]/AC and Ru/AC catalysts. Reaction conditions:  $T = 170\text{ }^{\circ}\text{C}$ ,  $\text{GHSV}(\text{C}_2\text{H}_2) = 360\text{ h}^{-1}$ , and  $V_{\text{HCl}}/V_{\text{C}_2\text{H}_2} = 1.1$ .

**Fig. S6** He adsorption-desorption isotherms of Ru-x[2DMI-DMU]/AC catalysts.

**Fig. S7** Ru3p XPS spectra of the reacted Ru-based catalysts.

**Fig. S8** He adsorption-desorption isotherms of the unreacted and reacted Ru-based catalysts.

**Fig. S9** FT-IR spectrum of (a) 2DMI-MU, (b) 2DMI-Urea, (c) 2DMI-CLAA, (d) 2TMU-DMU, (e) 2TMU-MU, (f) 2TMU-U and (g) 2TMU-CLAA.

**Fig. S10** Selectivity to VCM for (a) Ru-10[DES]/AC and (b) Ru-10[HBD]/AC and Ru-10[HBA]/AC catalysts. Reaction conditions:  $T = 170\text{ }^{\circ}\text{C}$ ,  $\text{GHSV}(\text{C}_2\text{H}_2) = 360\text{ h}^{-1}$ , and  $V_{\text{HCl}}/V_{\text{C}_2\text{H}_2} = 1.1$ .

**Fig. S11** ESP ( $\text{kcal mol}^{-1}$ ) on the vdW surfaces of HBD, HBA and DES.

**Fig. S12** Hydrogen bond length (HBL,  $\text{\AA}$ ) of DESs.

**Fig. S13** Relationship between HBL and  $E_{\text{HB}}$  for DES.

**Fig. S14** Correlation of  $E_{\text{HB}}$  of DESs with Conversion of  $\text{C}_2\text{H}_2$  over Ru-10[DES]/AC catalysts.

**Fig. S15** Catalyst experimental setup. 1. nitrogen, 2. hydrogen chloride, 3. acetylene, 4. pressure relief valve, 5. filter, 6. mass flowmeter, 7. one-way check valve, 8. heating furnace, 9. reactor, 10. catalyst, 11. thermocouple, 12. buffer tank, 13. absorption bottle.

### 3. Supplementary Tables

**Table S1** Pore structure parameters of Ru-x[2DMI-DMU]/AC catalysts

**Table S2** The catalytic performance of the Ru-based catalysts for acetylene hydrochlorination recently reported in the literature

**Table S3** Mulliken charge changes of O, Ru and Cl in the Ru complexes

**Table S4** The binding energy and relative content of Ru species in the Ru-based catalysts

**Table S5** Adsorption energies of C<sub>2</sub>H<sub>2</sub>, HCl and VCM on the Ru complexes

**Table S6** Pore structure parameters of Ru-based catalysts

**Table S7** Mulliken charge changes of Ru and Cl in the Ru complexes

**Table S8** The HBL and  $E_{HB}$  of DES

#### **4. References**

# 1. Experiment

## 1.1. DFT calculations

Density functional theory (DFT) calculations were performed in Gaussian 09 using the B3LYP function, corrected by the DFT-D3 method to optimise the analysis of the weak interactions.<sup>1, 2</sup> The Ru atoms underwent optimization with the SDD pseudopotential basis set, while the remaining atoms were geometrically optimized utilizing the 6-311G(d,p) basis set.<sup>3, 4</sup> Single-point energies were ascertained through the def2-TZVP basis set, and local energy minima were identified through vibrational frequency calculations.<sup>5-7</sup> The structural optimization's convergence criterion was set to the default Gaussian 09 setting. The energy of adsorption ( $E_{ad}$ ) is expressed by the following equation:

$$E_{ad} = E_{ad-state} - E_{cat} - E_{reactant} \# (1)$$

where  $E_{ad-state}$ ,  $E_{reactant}$ , and  $E_{cat}$  are terms that denote the adsorption energy of the catalyst concerning the feedstock reactant, the feedstock reactant itself, and the catalyst, respectively.

Furthermore, the distribution of electrostatic potentials on the surface was scrutinized using Multiwfn 3.8 and VMD software.<sup>8, 9</sup> The hydrogen bond energy ( $E_{HB}$ ) by Atoms-in-molecules (AIM) theory using the electron density at the position of the bond critical point (BCP) of the hydrogen bond, calculated in Equation 2.<sup>10</sup>

$$E_{HB} = -223.08 \times \rho_{BCP} + 0.7423 \# (2)$$

Here the  $E_{HB}$  is in kcal mol<sup>-1</sup> and the unit of  $\rho_{BCP}$  is in a.u.

## 1.2. Characterisation of the catalysts

Fourier transform infrared spectroscopy (FT-IR) spectrum was measured using a NICOLET iZ10 infrared spectrometer and was used to analyse changes in molecular structure. Nuclear magnetic resonance hydrogen spectroscopy (<sup>1</sup>H-NMR) was measured using Bruker AVANCE III 400 MHz with deuterium oxide (D<sub>2</sub>O) as the deuterium reagent and was used to observe changes in hydrogen at different positions in the sample. Ultraviolet-visible (UV-Vis) spectra at 190-600 nm were measured using an Agilent Cary 300 spectrophotometer to analyse the interactions between the metal precursors and the ligands. The structural parameters of the samples were determined using Quantachrome Autosorb-iQ to analyse the changes in specific surface area and

pore volume of the catalysts. Thermogravimetric analysis was performed using METTLER TOLEDO TGA/DSC-2 to analyse the amount of carbon deposited on the catalyst after the reaction. X-ray photoelectron spectroscopy (XPS) was measured using Thermo K-Alpha<sup>+</sup> and was used to determine the valence and relative content of Ru species. High-angle annular dark-field-scanning transmission electron microscope (HAADF-STEM) images and elemental mapping analyses were performed using JEM-2100F to observe the dispersion of the active components.

### 1.3. Catalytic performance evolution

The catalytic performance of the catalyst (2 mL) was evaluated under atmospheric pressure in a fixed-bed quartz reactor (Fig. S15, o.d. of 10 mm, i.d. of 8 mm). Before the reaction, the reactor was purged with a stream of N<sub>2</sub> (15 mL min<sup>-1</sup>) for 30 min to remove air and water while the temperature of the reactor was raised to 170 °C at a ramp rate of 5 °C min<sup>-1</sup>. Then HCl (13.2 mL min<sup>-1</sup>) was injected and the catalyst was activated at 170 °C for 30 min. Finally, a mixture of HCl (13.2 mL min<sup>-1</sup>) and C<sub>2</sub>H<sub>2</sub> (12 mL min<sup>-1</sup>) was introduced into the reactor for the catalytic reaction, and the C<sub>2</sub>H<sub>2</sub> gas hourly space velocity (GHSV(C<sub>2</sub>H<sub>2</sub>)) was controlled at 360 h<sup>-1</sup> throughout the catalytic reaction, and the volumes of catalyst were 1 mL and 4 mL for GHSV(C<sub>2</sub>H<sub>2</sub>) of 720 h<sup>-1</sup> and 90 h<sup>-1</sup>, respectively, and other test conditions were unchanged. The gaseous product of the reaction was purified and sent to a Gas Chromatograph (Shimadzu GC-2014C) for analysis to calculate the conversion of acetylene ( $X_A$ ) and selectivity to VCM ( $S_{VCM}$ ):

$$X_A = \frac{\Phi_{A0} - \Phi_A}{\Phi_{A0}} \times 100\% \quad (3)$$

$$S_{VCM} = \frac{\Phi_{VC}}{1 - \Phi_A} \times 100\% \quad (4)$$

The calculation of The VCM space-time yield (STY, g mL<sup>-1</sup> h<sup>-1</sup>) of the catalyst is calculated according to (3).

$$STY = \frac{V_{C_2H_2} * 60 * X_A * S_{VCM} * 62.5}{1000 * 22.4 * V_{cat}} \quad (5)$$

where  $\Phi_{A0}$  is defined as the volume fraction of acetylene in the feedstock gas,  $\Phi_A$  is defined as the volume fraction of remaining acetylene in the product gas, and  $\Phi_{VC}$  is the volume fraction of VCM in the product gas.  $V_{C_2H_2}$  is the volume flow of acetylene and  $V_{cat}$  is the volume of catalyst.

## 2. Supplementary Figures

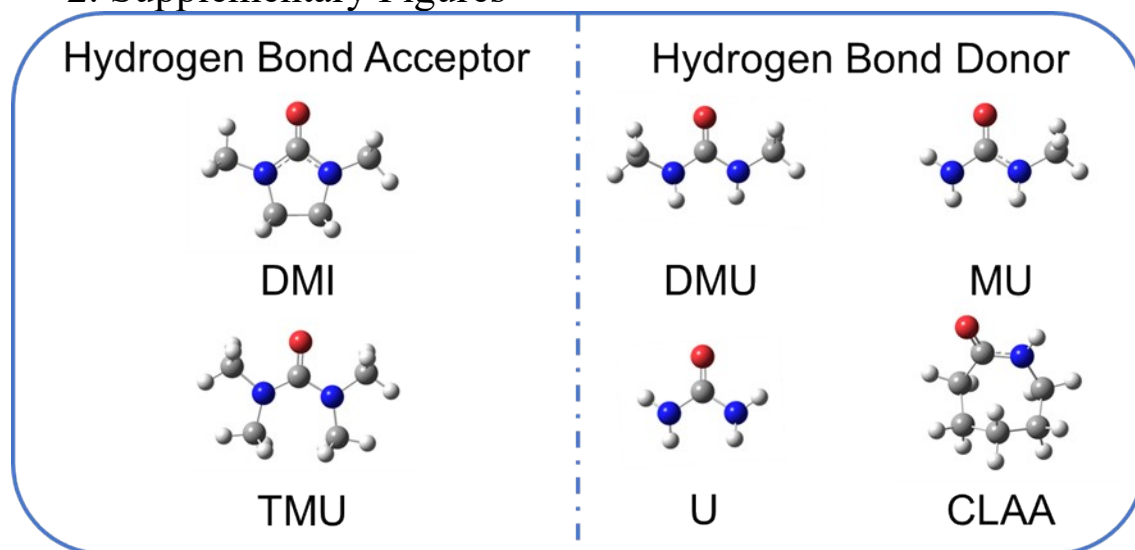

**Fig. S1** Chemical structure and abbreviation of HBAs and HBDs used.

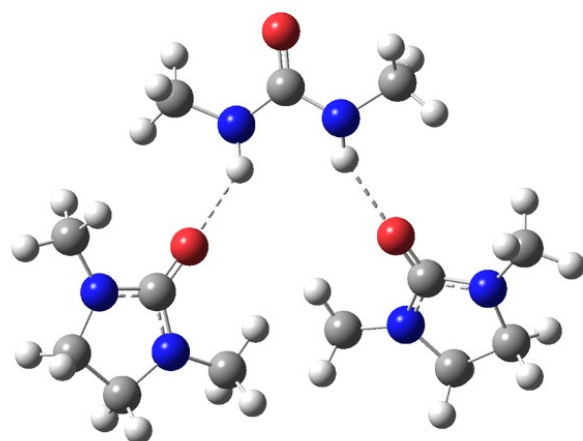

**Fig. S2** Hydrogen bond structure of 2DMI-DMU.



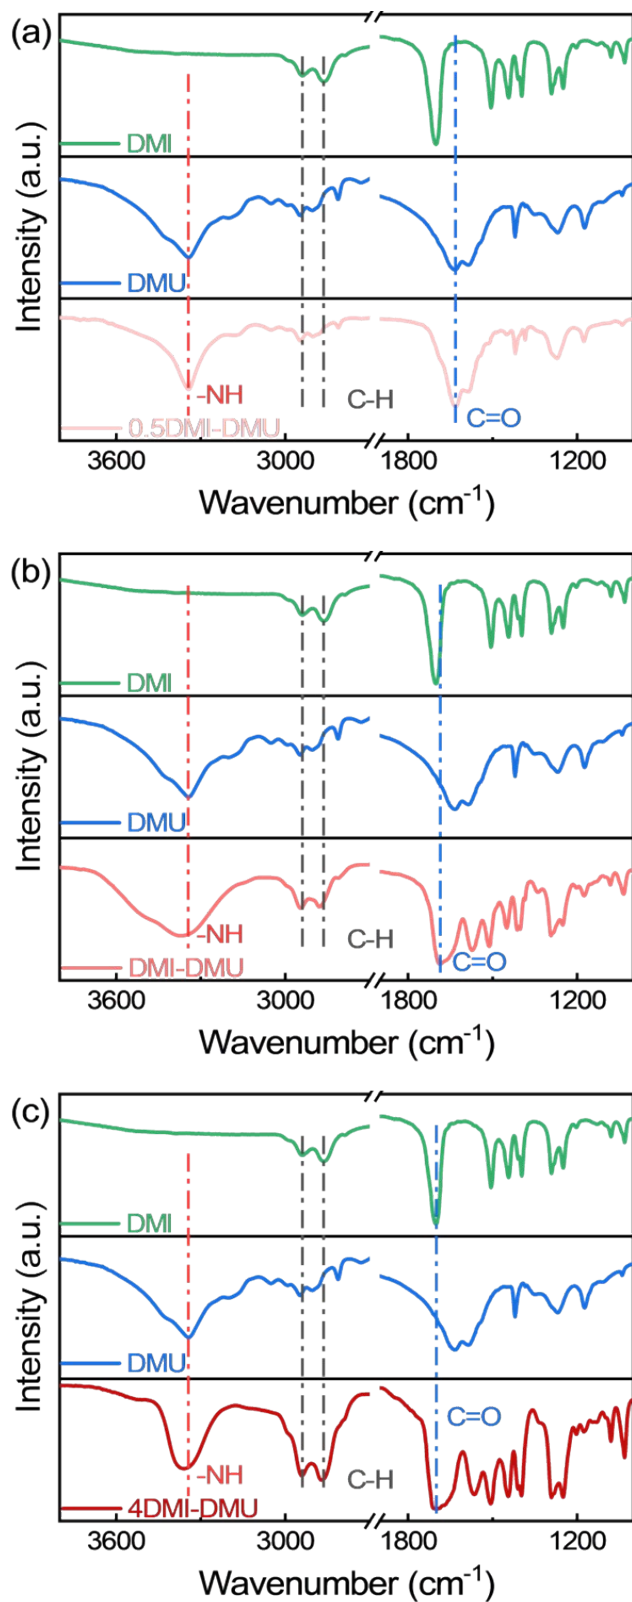

**Fig. S3** FT-IR spectrum of (a) 0.5DMI-DMU, (b) 1DMI-DMU and (c) 4DMI-DMU.

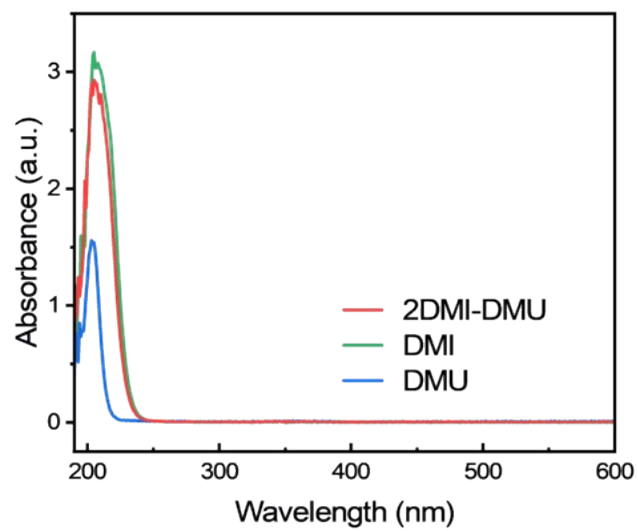

**Fig. S4** UV-Vis spectra of 2DMI-DMU, DMI and DMU.

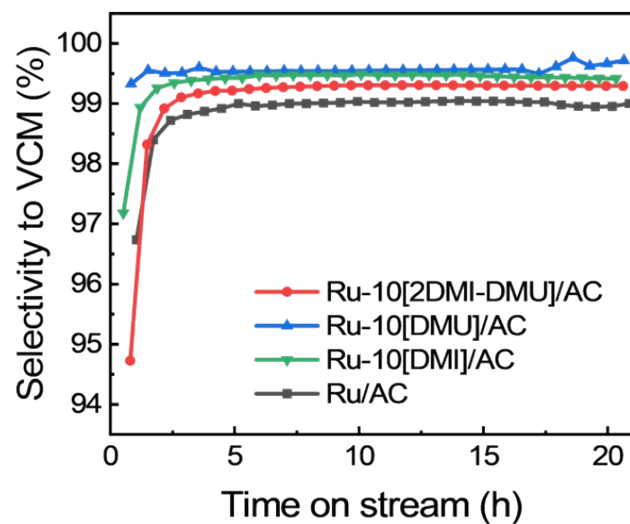

**Fig. S5** Selectivity to VCM (a) for Ru-10[2DMI-DMU]/AC, Ru-10[DMU]/AC, Ru-10[DMI]/AC and Ru/AC catalysts. Reaction conditions:  $T = 170\text{ }^{\circ}\text{C}$ ,  $\text{GHSV}(\text{C}_2\text{H}_2) = 360\text{ h}^{-1}$ , and  $V_{\text{HCl}}/V_{\text{C}_2\text{H}_2} = 1.1$ .

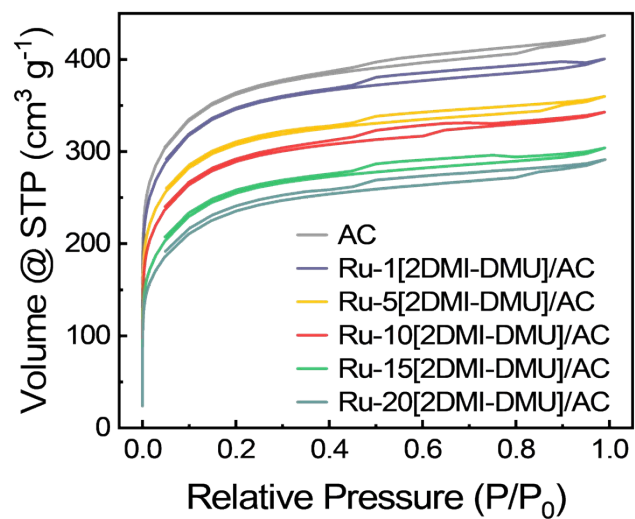

**Fig. S6** He adsorption-desorption isotherms of Ru-x[2DMI-DMU]/AC catalysts.

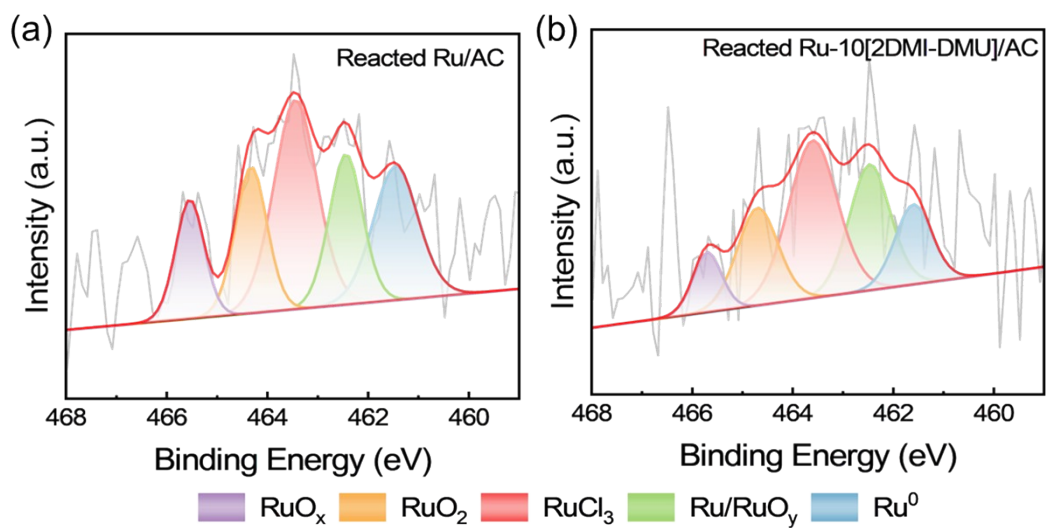

**Fig. S7** Ru3p XPS spectra of the reacted Ru-based catalysts.

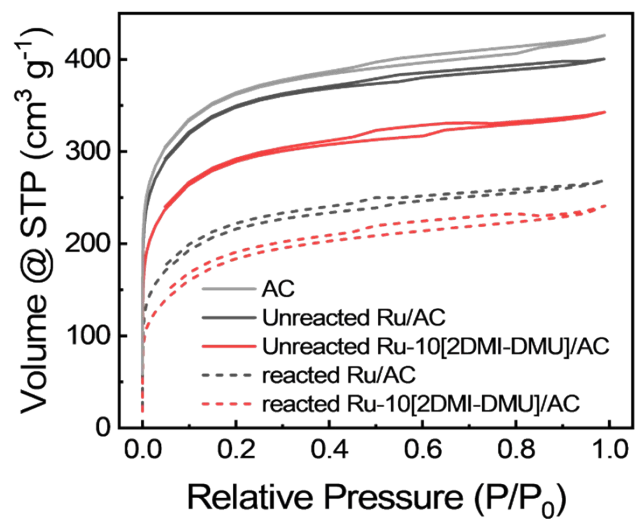

**Fig. S8** He adsorption-desorption isotherms of the unreacted and reacted Ru-based catalysts.

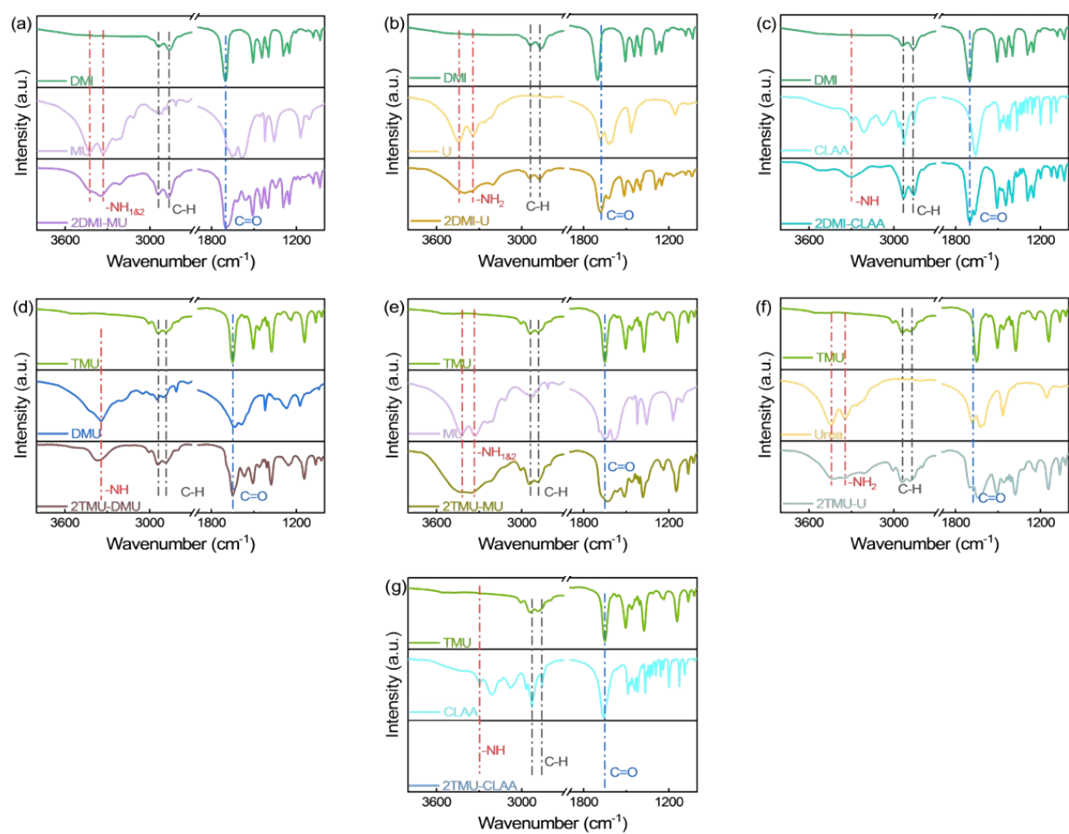

**Fig. S9** FT-IR spectrum of (a) 2DMI-MU, (b) 2DMI-Urea, (c) 2DMI-CLAA, (d) 2TMU-DMU, (e) 2TMU-MU, (f) 2TMU-U and (g) 2TMU-CLAA.

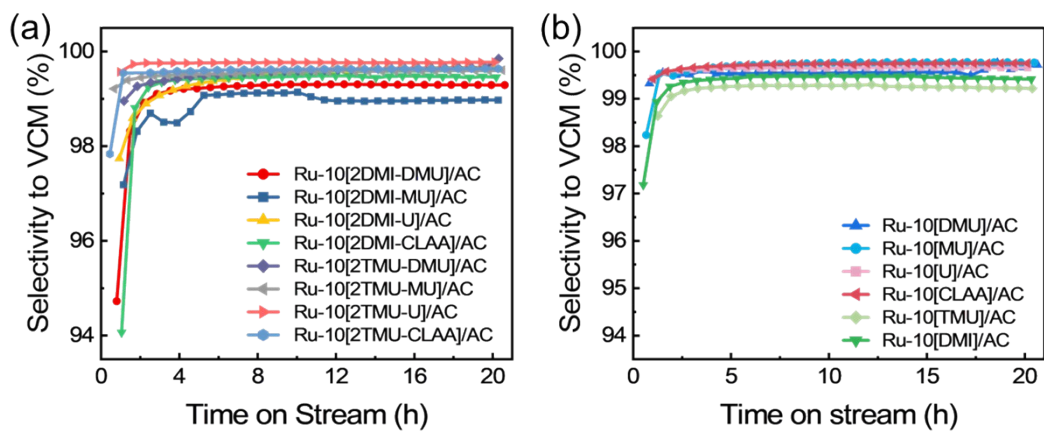

**Fig. S10** Selectivity to VCM for (a) Ru-10[DES]/AC and (b) Ru-10[HBD]/AC and Ru-10[HBA]/AC catalysts. Reaction conditions:  $T = 170\text{ }^{\circ}\text{C}$ ,  $\text{GHSV}(\text{C}_2\text{H}_2) = 360\text{ h}^{-1}$ , and  $V_{\text{HCl}}/V_{\text{C}_2\text{H}_2} = 1.1$ .



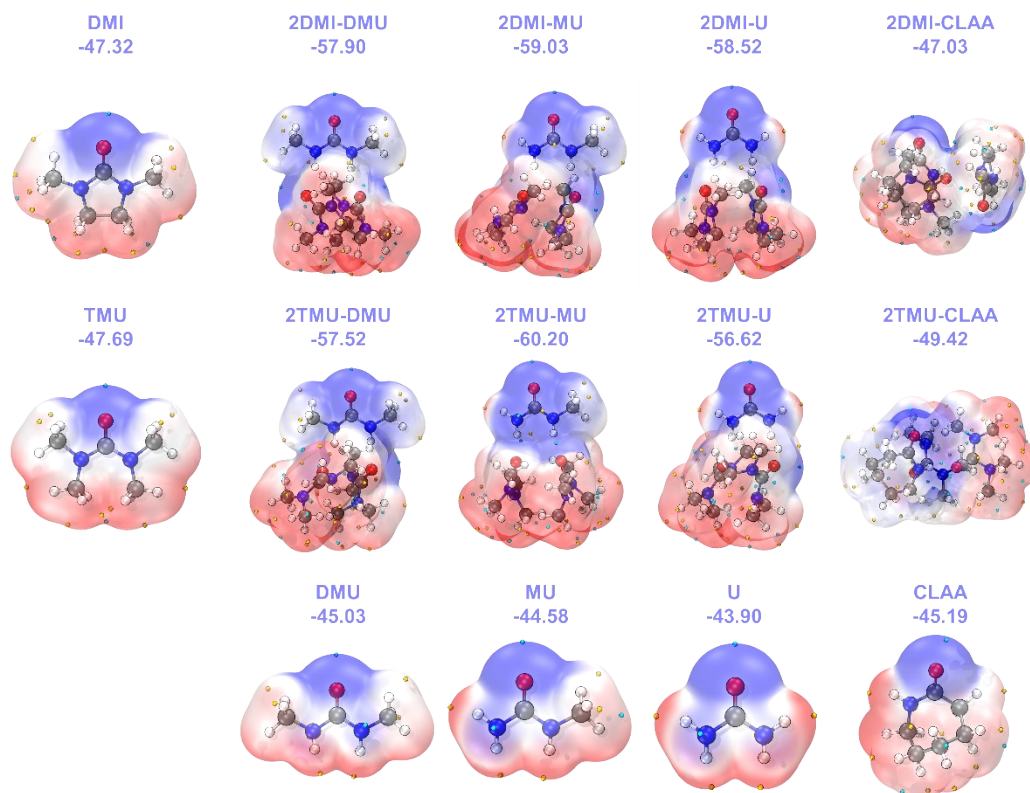

**Fig. S11** ESP (kcal mol<sup>-1</sup>) on the vdW surfaces of HBD, HBA and DES.

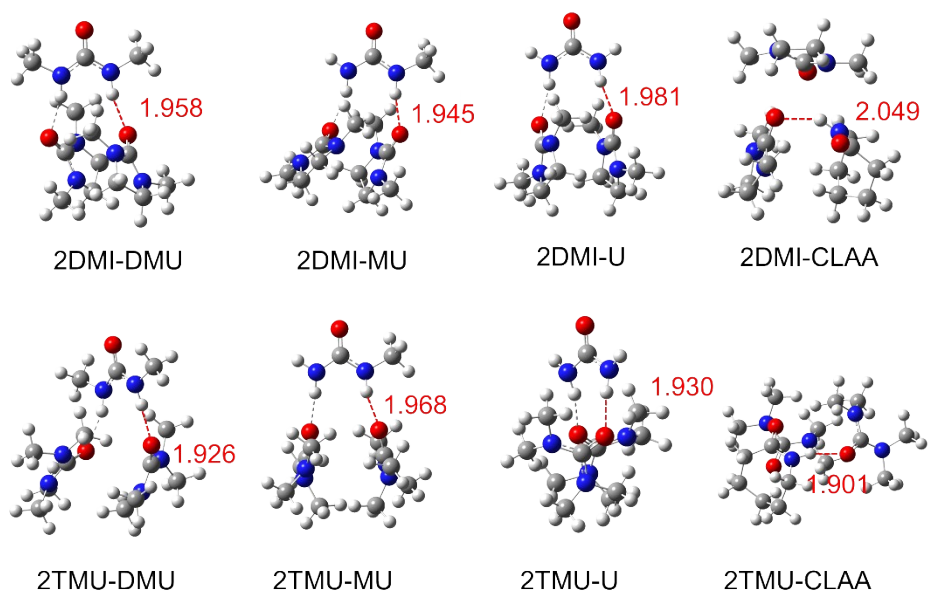

**Fig. S12** Hydrogen bond length (HBL, Å) of DES.

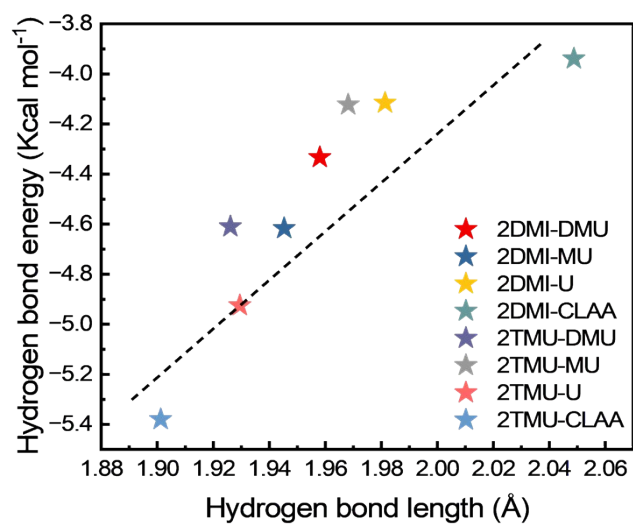

**Fig. S13** Relationship between HBL and  $E_{\text{HB}}$  for DES.

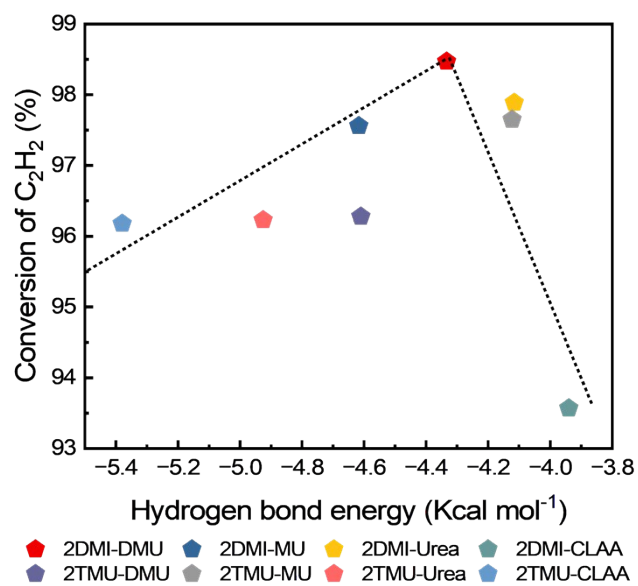

**Fig. S14** Correlation of  $E_{HB}$  of DESs with Conversion of  $C_2H_2$  over Ru-10[DES]/AC catalysts

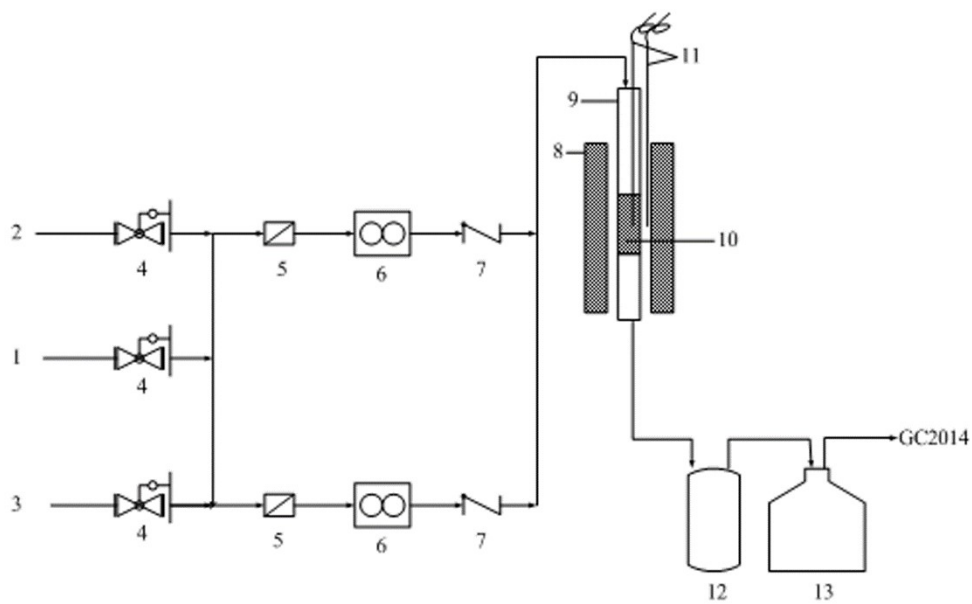

**Fig. S15** Catalyst experimental setup. 1. nitrogen, 2. hydrogen chloride, 3. acetylene, 4. pressure relief valve, 5. filter, 6. mass flowmeter, 7. one-way check valve, 8. heating furnace, 9. reactor, 10. catalyst, 11. thermocouple, 12. buffer tank, 13. absorption bottle.

### 3. Supplementary Tables

**Table S1** Pore structure parameters of Ru-x[2DMI-DMU]/AC catalysts

| Catalyst           | $S_{\text{BET}}^{\text{a}}$<br>( $\text{m}^2 \text{g}^{-1}$ ) | $S_{\text{micro.}}^{\text{b}}$<br>( $\text{m}^2 \text{g}^{-1}$ ) | $S_{\text{ext.}}^{\text{c}}$<br>( $\text{m}^2 \text{g}^{-1}$ ) | $V_{\text{p}}^{\text{d}}$<br>( $\text{cm}^3 \text{g}^{-1}$ ) | $V_{\text{micro.}}^{\text{e}}$<br>( $\text{cm}^3 \text{g}^{-1}$ ) | $D_{\text{pore}}^{\text{f}}$<br>(nm) |
|--------------------|---------------------------------------------------------------|------------------------------------------------------------------|----------------------------------------------------------------|--------------------------------------------------------------|-------------------------------------------------------------------|--------------------------------------|
| AC                 | 1326                                                          | 1122                                                             | 204                                                            | 0.659                                                        | 0.477                                                             | 1.988                                |
| Ru-1[2DMI-DMU]/AC  | 1264                                                          | 1079                                                             | 185                                                            | 0.620                                                        | 0.459                                                             | 1.960                                |
| Ru-5[2DMI-DMU]/AC  | 1125                                                          | 962                                                              | 163                                                            | 0.557                                                        | 0.409                                                             | 1.979                                |
| Ru-10[2DMI-DMU]/AC | 1053                                                          | 887                                                              | 167                                                            | 0.530                                                        | 0.379                                                             | 2.013                                |
| Ru-15[2DMI-DMU]/AC | 926                                                           | 766                                                              | 160                                                            | 0.470                                                        | 0.329                                                             | 2.032                                |
| Ru-20[2DMI-DMU]/AC | 852                                                           | 685                                                              | 167                                                            | 0.451                                                        | 0.296                                                             | 2.115                                |

[a]  $S_{\text{BET}}$ : BET specific surface area; [b] t-plot micropore area; [c] t-plot external surface area; [d]  $V_{\text{p}}$ : total pore volume, volume at  $p/p_0 = 0.98$ ; [e] t-plot micropore volume; [f] Adsorption average pore width ( $4V/A$  by BET).

**Table S2** The catalytic performance of the Ru-based catalysts for acetylene hydrochlorination recently reported in the literature

| Catalysts                      | Ligands/ionic liquids                         | Ru content (wt%) | Reaction temperature (°C) | GHSV(C <sub>2</sub> H <sub>2</sub> ) (h <sup>-1</sup> ) | V <sub>HCl</sub> /V <sub>C<sub>2</sub>H<sub>2</sub></sub> | Initial maximum C <sub>2</sub> H <sub>2</sub> conversion (%) | STY (g mL <sup>-1</sup> h <sup>-1</sup> ) <sup>a</sup> | Ref.      |
|--------------------------------|-----------------------------------------------|------------------|---------------------------|---------------------------------------------------------|-----------------------------------------------------------|--------------------------------------------------------------|--------------------------------------------------------|-----------|
| Ru-10%Foli/AC                  | Formamide                                     | 1                | 150                       | 360                                                     | 1.15                                                      | 93.9                                                         | 0.934                                                  | 11        |
| IPr-(Ru)/AC                    | N-heterocyclic carbene                        | 1                | 180                       | 180                                                     | 1.15                                                      | 99                                                           | 0.492                                                  | 12        |
| Ru-Thi/AC                      | thiourea                                      | 1                | 170                       | 400                                                     | 1.1                                                       | 85.1                                                         | 0.940                                                  | 13        |
| Ru-L <sub>8</sub> /AC          | 1-Isopropylimidazole                          | 1                | 180                       | 720                                                     | 1.15                                                      | 85                                                           | 1.691                                                  | 14        |
| Ru15%TBAH/AC                   | Tetrabutylammonium hexafluorophosphate        | 1                | 170                       | 360                                                     | 1.1                                                       | 99                                                           | 0.984                                                  | 15        |
| 1Ru-5IL <sub>5</sub> /AC       | Butyl(triphenyl)phosphonium chloride          | 1                | 180                       | 720                                                     | 1.15                                                      | 93.9                                                         | 1.868                                                  | 16        |
| 1%Ru@15%TPPB/AC                | Tetraphenylphosphonium bromide                | 1                | 170                       | 360                                                     | 1.15                                                      | 99.7                                                         | 0.991                                                  | 17        |
| Ru10%[BMIM]BF <sub>4</sub> /AC | 1-Butyl-3-methylimidazolium tetrafluoroborate | 1                | 170                       | 360                                                     | 1.1                                                       | 99.0                                                         | 0.984                                                  | 18        |
| Ru-10[2DMI-DMU]/AC             | 2DMI-DMU                                      | 1                | 170                       | 360                                                     | 1.1                                                       | 98.7                                                         | 0.981                                                  | This work |
| Ru-10[2DMI-DMU]/AC             | 2DMI-DMU                                      | 1                | 170                       | 720                                                     | 1.1                                                       | 93.1                                                         | 1.852                                                  | This work |

[a]: The S<sub>VCM</sub> of all catalysts is about 99%.

**Table S3** Mulliken charge changes of O, Ru and Cl in the Ru complexes

| Catalyst          | The Mulliken charges of atoms (eV) |       |                 |                 |                 |                          |
|-------------------|------------------------------------|-------|-----------------|-----------------|-----------------|--------------------------|
|                   | O                                  | Ru    | Cl <sub>1</sub> | Cl <sub>2</sub> | Cl <sub>3</sub> | Sum (RuCl <sub>3</sub> ) |
| RuCl <sub>3</sub> |                                    | 1.144 | -0.426          | -0.359          | -0.359          | 0                        |
| DMI               | -0.420                             |       |                 |                 |                 |                          |
| Ru-[DMI]          | -0.338                             | 0.891 | -0.641          | -0.329          | -0.297          | -0.376                   |
| DMU               | -0.400                             |       |                 |                 |                 |                          |
| Ru-[DMU]          | -0.285                             | 1.034 | -0.584          | -0.546          | -0.297          | -0.393                   |
| 2DMI-DMU          | -0.415                             |       |                 |                 |                 |                          |
| Ru-[2DMI-DMU]     | -0.306                             | 0.829 | -0.653          | -0.352          | -0.326          | -0.502                   |



**Table S4** The binding energy and relative content of Ru species in the Ru-based catalysts

| Catalyst                     | (Binding energy (eV)), area (%) |      |                     |      |                   |      |                  |      |                  |      |                        |
|------------------------------|---------------------------------|------|---------------------|------|-------------------|------|------------------|------|------------------|------|------------------------|
|                              | Ru <sup>0</sup>                 |      | Ru/RuO <sub>y</sub> |      | RuCl <sub>3</sub> |      | RuO <sub>2</sub> |      | RuO <sub>x</sub> |      | Ru <sup>m+</sup> (m>0) |
| Unreacted Ru/AC              | (461.6)                         | 12.3 | (462.2)             | 10.4 | (463.3)           | 35.3 | (464.4)          | 26.1 | (465.7)          | 15.8 | 87.7                   |
| Unreacted Ru-10[DMI]/AC      | (461.6)                         | 12.2 | (462.3)             | 20.2 | (463.3)           | 39.7 | (464.5)          | 16.8 | (465.5)          | 11.2 | 87.8                   |
| Unreacted Ru-10[DMU]/AC      | (461.7)                         | 11.4 | (462.5)             | 25.8 | (463.4)           | 34.2 | (464.7)          | 20.1 | (465.8)          | 8.5  | 88.6                   |
| Unreacted Ru-10[2DMI-DMU]/AC | (461.6)                         | 10.2 | (462.7)             | 29.5 | (463.9)           | 32.0 | (464.9)          | 15.4 | (466.4)          | 13.0 | 89.8                   |
| Reacted Ru/AC                | (461.5)                         | 17.4 | (462.4)             | 19.4 | (463.4)           | 36.1 | (464.3)          | 16.0 | (465.5)          | 11.0 | 82.6                   |
| Reacted Ru-10[2DMI-DMU]/AC   | (461.6)                         | 13.6 | (462.5)             | 24.4 | (463.6)           | 37.2 | (464.7)          | 16.0 | (465.7)          | 8.9  | 86.4                   |

**Table S5** Adsorption energies of C<sub>2</sub>H<sub>2</sub>, HCl and VCM on the Ru complexes

|                   | $E_{\text{ad}}$ (kcal mol <sup>-1</sup> ) |       |       |
|-------------------|-------------------------------------------|-------|-------|
|                   | C <sub>2</sub> H <sub>2</sub>             | HCl   | VCM   |
| DMI               | -8.4                                      | -13.4 | —     |
| DMU               | -5.4                                      | -10.5 | —     |
| 2DMI-DMU          | -6.7                                      | -15.2 | —     |
| RuCl <sub>3</sub> | -32.1                                     | -16.7 | -40.3 |
| Ru-DMI            | -19.1                                     | -10.5 | -22.2 |
| Ru-DMU            | -23.2                                     | -11.5 | -25.4 |
| Ru-[2DMI-DMU]     | -18.8                                     | -9.03 | -21.2 |

**Table S6** Pore structure parameters of Ru-based catalysts

| Catalyst                     | $S_{\text{BET}}^{\text{a}}$<br>( $\text{m}^2 \text{g}^{-1}$ ) | $\Delta S_{\text{BET}}$ | $S_{\text{micro.}}^{\text{b}}$<br>( $\text{m}^2 \text{g}^{-1}$ ) | $\Delta S_{\text{micro.}}$ | $S_{\text{ext.}}^{\text{c}}$<br>( $\text{m}^2 \text{g}^{-1}$ ) | $V_{\text{p}}^{\text{d}}$<br>( $\text{cm}^3 \text{g}^{-1}$ ) | $\Delta V_{\text{p}}$ | $V_{\text{micro.}}^{\text{e}}$<br>( $\text{cm}^3 \text{g}^{-1}$ ) | $\Delta V_{\text{micro.}}$ |
|------------------------------|---------------------------------------------------------------|-------------------------|------------------------------------------------------------------|----------------------------|----------------------------------------------------------------|--------------------------------------------------------------|-----------------------|-------------------------------------------------------------------|----------------------------|
| Unreacted Ru/AC              | 1269                                                          | 489                     | 1086                                                             | 467                        | 183                                                            | 0.619                                                        | 0.205                 | 0.464                                                             | 0.196                      |
| Reacted Ru/AC                | 780                                                           |                         | 619                                                              |                            | 161                                                            | 0.415                                                        |                       | 0.268                                                             |                            |
| Unreacted Ru-10[2DMI-DMU]/AC | 1053                                                          | 395                     | 887                                                              | 408                        | 167                                                            | 0.530                                                        | 0.157                 | 0.379                                                             | 0.169                      |
| Reacted Ru-10[2DMI-DMU]/AC   | 658                                                           |                         | 479                                                              |                            | 179                                                            | 0.373                                                        |                       | 0.210                                                             |                            |

[a]  $S_{\text{BET}}$ : BET specific surface area; [b] t-plot micropore area; [c] t-plot external surface area; [d]  $V_{\text{p}}$ : total pore volume, volume at  $p/p_0 = 0.98$ ; [e] t-plot micropore volume; [f] Adsorption average pore width ( $4V/A$  by BET).

**Table S7** Mulliken charge changes of Ru and Cl in the Ru complexes

|                   | The Mulliken charges of atoms (eV) |                 |                 |                 |        |
|-------------------|------------------------------------|-----------------|-----------------|-----------------|--------|
|                   | Ru                                 | Cl <sub>1</sub> | Cl <sub>2</sub> | Cl <sub>3</sub> | Sum    |
| RuCl <sub>3</sub> | 1.144                              | -0.426          | -0.359          | -0.359          | 0      |
| Ru-[DMU]          | 1.034                              | -0.584          | -0.546          | -0.297          | -0.393 |
| Ru-[2DMI-DMU]     | 0.829                              | -0.653          | -0.352          | -0.326          | -0.502 |
| Ru-[2TMU-DMU]     | 1.053                              | -0.705          | -0.494          | -0.263          | -0.409 |
| Ru-[MU]           | 0.902                              | -0.595          | -0.313          | -0.302          | -0.308 |
| Ru-[2DMI-MU]      | 0.781                              | -0.747          | -0.259          | -0.155          | -0.380 |
| Ru-[2TMU-MU]      | 0.789                              | -0.721          | -0.144          | -0.326          | -0.402 |
| Ru-[U]            | 0.912                              | -0.596          | -0.304          | -0.303          | -0.291 |
| Ru-[2DMI-U]       | 1.013                              | -0.652          | -0.480          | -0.294          | -0.413 |
| Ru-[2TMU-U]       | 1.064                              | -0.641          | -0.524          | -0.307          | -0.408 |
| Ru-[CLAA]         | 0.99                               | -0.69           | -0.257          | -0.252          | -0.209 |
| Ru-[2DMI-CLAA]    | 1.054                              | -0.721          | -0.419          | -0.310          | -0.396 |
| Ru-[2TMU-CLAA]    | 0.792                              | -0.711          | -0.338          | -0.214          | -0.471 |

**Table S8** The HBL and  $E_{\text{HB}}$  of DES

| DES       | HBL (Å) | $E_{\text{HB}}$ (Kcal mol <sup>-1</sup> ) |
|-----------|---------|-------------------------------------------|
| 2DMI-DMU  | 1.958   | -4.334                                    |
| 2DMI-MU   | 1.945   | -4.617                                    |
| 2DMI-Urea | 1.981   | -4.116                                    |
| 2DMI-CLAA | 2.049   | -3.940                                    |
| 2TMU-DMU  | 1.926   | -4.610                                    |
| 2TMU-MU   | 1.968   | -4.123                                    |
| 2TMU-Urea | 1.930   | -4.925                                    |
| 2TMU-CLAA | 1.901   | -5.380                                    |

## 4. References

- 1 S. Grimme, J. Antony, S. Ehrlich and H. Krieg, *J Chem Phys*, 2010, **132**, 154104.
- 2 M. J. Frisch, G. W. Trucks, H. B. Schlegel, G. E. Scuseria, M. A. Robb, J. R. Cheeseman, G. Scalmani, V. Barone, G. A. Petersson, H. Nakatsuji, X. Li, M. Caricato, A. V. Marenich, J. Bloino, B. G. Janesko, R. Gomperts, B. Mennucci, H. P. Hratchian, J. V. Ortiz, A. F. Izmaylov, J. L. Sonnenberg, D. Williams-Young, F. Ding, F. Lipparini, F. Egidi, J. Goings, B. Peng, A. Petrone, T. Henderson, D. Ranasinghe, V. G. Zakrzewski, J. Gao, N. Rega, G. Zheng, W. Liang, M. Hada, M. Ehara, K. Toyota, R. Fukuda, J. Hasegawa, M. Ishida, T. Nakajima, Y. Honda, O. Kitao, H. Nakai, T. Vreven, K. Throssell, J. A. Montgomery Jr., J. E. Peralta, F. Ogliaro, M. J. Bearpark, J. J. Heyd, E. N. Brothers, K. N. Kudin, V. N. Staroverov, T. A. Keith, R. Kobayashi, J. Normand, K. Raghavachari, A. P. Rendell, J. C. Burant, S. S. Iyengar, J. Tomasi, M. Cossi, J. M. Millam, M. Klene, C. Adamo, R. Cammi, J. W. Ochterski, R. L. Martin, K. Morokuma, O. Farkas, J. B. Foresman and D. J. Fox, *Journal*, 2016.
- 3 K. Eichkorn, F. Weigend, O. Treutler and R. Ahlrichs, *Theoretical Chemistry Accounts*, 1997, **97**, 119-124.
- 4 B. Miehlich, A. Savin, H. Stoll and H. Preuss, *Chem. Phys. Lett.*, 1989, **157**, 200-206.
- 5 Y. Zhao and D. G. Truhlar, *The Journal of Physical Chemistry A*, 2008, **112**, 6794-6799.
- 6 Y. Zhao and D. G. Truhlar, *The Journal of Chemical Physics*, 2006, **125**, 194101.
- 7 F. Weigend and R. Ahlrichs, *Phys. Chem. Chem. Phys.*, 2005, **7**, 3297-3305.
- 8 T. Lu and F. Chen, *J. Comput. Chem.*, 2012, **33**, 580-592.
- 9 T. Lu and F. Chen, *J. Mol. Graph. Model.*, 2012, **38**, 314-323.
- 10 S. Emamian, T. Lu, H. Kruse and H. Emamian, *J. Comput. Chem.*, 2019, **40**, 2868-2881.
- 11 Y. Li, F. Wang, J. Hu, M. Sun, J. Wang and X. Zhang, *Catal. Sci. Technol.*, 2021, **11**, 7347-7358.
- 12 M. Cai, H. Zhang, B. Man, J. Li, L. Li, Y. Li, D. Xie, R. Deng and J. Zhang, *Catal. Sci. Technol.*, 2020, **10**, 3552-3560.
- 13 X. Wang, G. Lan, Z. Cheng, W. Han, H. Tang, H. Liu and Y. Li, *Chin. J. Catal.*, 2020, **41**, 1683-1691.
- 14 J. Li, H. Zhang, M. Cai, L. Li, Y. Li, R. Zhao and J. Zhang, *Appl. Catal., A*, 2020, **592**, 117431.
- 15 H. You, H. Zhang, L. Yu, N. Yao, L. Wei and J. Zhang, *Catal. Today*, 2020, **355**, 205-213.
- 16 J. Li, H. Zhang, L. Li, M. Cai, Y. Li, D. Xie and J. Zhang, *ACS Sustainable Chem. Eng.*, 2020, **8**, 10173-10184.
- 17 S. Shang, W. Zhao, Y. Wang, X. Li, J. Zhang, Y. Han and W. Li, *ACS Catal.*, 2017, **7**, 3510-3520.
- 18 Y. Li, Y. Dong, W. Li, Y. Han and J. Zhang, *Mol. Catal.*, 2017, **443**, 220-227.
